# Supplementary material
Source: publisher figshare collection journal article supplement (https://acs.figshare.com/ndownloader/files/6451398)
Supplement: Supplementary file 1 [file 6451398]

## Supporting Information:

**General Methods and Materials.**  $^1\text{H}$  and  $^{13}\text{C}$  NMR spectra were recorded at 300 MHz and 75.5 MHz, respectively. The azido acids (**1**, **2**, and **4**) and final crude peptide products (**11a–11c**) were analyzed by automated LC/MS as follows. All mass spectra were acquired using a Waters (Micromass) ZMD single quadrupole mass spectrometer equipped with a Z-spray electrospray interface and probe. The LC instrument used was a Waters Alliance 2690 equipped with a 5-carousel, 120 vial position autosampler, and a model 996 PDA (photodiode array) detector. The PDA is scanned from 210 to 400 nm with a 2.4 nm resolution at a scan rate of 1 spectrum/second. The HPLC column used was a Waters, Inc. XTerra MS C18, 2.1 x 50 mm, 5 $\mu\text{m}$ . The mobile phases used are 0.1% formic acid in water (A) and 0.1% formic acid in acetonitrile (B). Purity was determined for the peptide products (**11a–11c**) by integration of the UV peak for the product as a percent of total area. Samples were run at 0.8 mL per min with a gradient of 10%B to 95% B over 2 min. All azido acid products (**1**, **2**, and **4**) were analyzed by IR and gave a spectral band in the range of 2160–2095  $\text{cm}^{-1}$ , consistent with the presence of the azido functionality.

Triflyl anhydride and  $\text{Cu(II)SO}_4$  pentahydrate 99.999% were obtained from Aldrich.  $\epsilon$ -N-Fmoc-L-lysine (**5**) and L-Glu-OtButylester (**3**) were obtained from Bachem. Fmoc-Phe-Wang-resin (1 mmol/g, 100 mesh) and Fmoc-Val-OSu were obtained from Advanced Chem Tech. Preparation of many common  $\alpha$ -azidoacid building blocks was described earlier.<sup>13</sup> The azidoacids (azido-Val, azido-Ile, and azido-Ala) incorporated into the cyclic peptide products were synthesized by the same method.

**Synthesis of (4S)-4-azido-5-tert-butoxy-5-oxopentanoic acid (**4**).** The diazo transfer reactions utilize the method of Wong<sup>14</sup> for carbohydrates with a modified work-up to accommodate the free acid products.<sup>13</sup> Triflyl azide preparation: A solution of sodium azide (2.25 g, 34.7 mmol) was dissolved in deionized  $\text{H}_2\text{O}$  (5.7 mL) with  $\text{CH}_2\text{Cl}_2$  (9.5 mL) and cooled in an ice bath. Triflyl anhydride (1.18 mL, 7.04 mmol) was added slowly over 5 min while stirring continued for 2 h. The mixture was placed in a separatory funnel and the  $\text{CH}_2\text{Cl}_2$  phase removed. The aqueous portion was extracted with  $\text{CH}_2\text{Cl}_2$  (2 x 4.75 mL). The organic fractions, containing the triflyl azide, were combined and washed once with saturated  $\text{Na}_2\text{CO}_3$  and used without further purification. L-Glu-OtButylester (**3**) (715 mg, 3.52 mmol) was combined with  $\text{K}_2\text{CO}_3$  (731 mg, 5.3 mmol),  $\text{Cu(II)SO}_4$  pentahydrate (8.8 mg, 35.2  $\mu\text{mol}$ ), distilled  $\text{H}_2\text{O}$  (11.4 mL) and  $\text{CH}_3\text{OH}$  (22.7 mL). The triflyl azide in  $\text{CH}_2\text{Cl}_2$  (19 mL) was added and the mixture was stirred at ambient temperature overnight. Subsequently, the organic solvents were removed under reduced pressure and the aqueous slurry was diluted with  $\text{H}_2\text{O}$  (75 mL). This was

acidified to pH 2 with 6 N HCl. The product was isolated by  $\text{CH}_2\text{Cl}_2$  extractions (3 x 50 mL). The organic extracts were combined, washed with  $\text{H}_2\text{O}$  (1x), dried ( $\text{MgSO}_4$ ), and evaporated to dryness giving 807 mg of the pale oil (**4**) in 82% yield with no need for further purification.  $[\alpha]_D^{22} = -60.5$  ( $c = 1.0$  in  $\text{CH}_3\text{OH}$ );  $^1\text{H}$  NMR (300 MHz,  $\text{CDCl}_3$ )  $\delta$  3.85 (dd,  $J = 5.2, 8.7$  Hz, 1H), 2.49 (t,  $J = 7.6$  Hz, 2H) 2.25–2.10 (m, 1H), 2.10–1.95 (m, 1H), 1.49 (s, 9H);  $^{13}\text{C}$  NMR (75.5 MHz,  $\text{CDCl}_3$ )  $\delta$  177.8, 168.9, 83.3, 61.4, 29.8, 28.0, 26.1; LC/MS retention time 1.30 min,  $[\text{M} - \text{H}]^-$  228.

**Synthesis of  $\alpha$ -azido- $\gamma$ -9-fluorenylmethylester-L-glutamic acid (**1**).** Compound **4** (370 mg, 1.61 mmol), dimethylaminopyridine (39.3 mg, 0.322 mmol), and 9-fluorenylmethanol (348 mg, 1.78 mmol) were dissolved in  $\text{CH}_2\text{Cl}_2$  (6.6 mL) and cooled to 0  $^\circ\text{C}$ . Next, EDC (340 mg, 1.78 mmol) was added and the reaction was stirred for 1 h at 0  $^\circ\text{C}$  and then allowed to warm to room temperature. The crude reaction was concentrated under reduced pressure and treated with 50% TFA in  $\text{CH}_2\text{Cl}_2$  for 30 min at room temperature. After concentration the reaction mixture was partitioned between EtOAc (75 mL) and brine (75 mL). The organic phase was washed with brine,  $\text{H}_2\text{O}$  (2x), and dried ( $\text{MgSO}_4$ ). After concentration, flash chromatography eluting with 5%  $\text{CH}_3\text{OH}$  in  $\text{CH}_2\text{Cl}_2$  gave 566 mg of a pale oil (**1**) in 65% yield. Lyophilization gave the product as a white solid. mp 56–58 $^\circ\text{C}$ ;  $R_f$  0.30 (5%  $\text{CH}_3\text{OH}$  in  $\text{CH}_2\text{Cl}_2$ );  $[\alpha]_D^{22} = -27.8$  ( $c = 1.0$  in  $\text{CH}_3\text{OH}$ );  $^1\text{H}$  NMR (300 MHz,  $\text{CDCl}_3$ )  $\delta$  7.80–7.20 (m, 8H), 4.41 (d,  $J = 6.8$  Hz, 2H), 4.18 (t,  $J = 6.8$  Hz, 1H), 3.99 (dd,  $J = 5.1, 8.2$  Hz, 1H), 2.53 (t,  $J = 7.2$  Hz, 2H), 2.30–2.15 (m, 1H), 2.10–1.95 (m, 1H);  $^{13}\text{C}$  NMR (75.5 MHz,  $\text{CDCl}_3$ )  $\delta$  175.5, 172.5, 143.6, 141.3, 127.8, 127.1, 124.9, 120.0, 66.6, 61.8, 46.7, 30.0, 26.5; LC/MS retention time 1.76 min,  $[\text{M} - \text{H}]^-$  350,  $[\text{M} + \text{H}]^+$  352.

**Synthesis of  $\alpha$ -azido- $\epsilon$ -N-Fmoc-L-lysine (**2**).** A 15 mL aliquot of triflyl azide (5.58 mmol, 2 equiv.) prepared as described above, was added to  $\epsilon$ -N-Fmoc-L-lysine (**5**) (1.03 gm, 2.79 mmol) and  $\text{Cu(II)SO}_4$  pentahydrate (7.00 mg, 27.9  $\mu\text{mol}$ ) in distilled  $\text{H}_2\text{O}$  (9 mL) and  $\text{CH}_3\text{OH}$  (18 mL). Next, DIPEA (971  $\mu\text{L}$ , 5.58 mmol) was added with stirring and the reaction continued overnight. The organic solvents were removed under vacuum and  $\text{H}_2\text{O}$  (100 mL) was added. The pH was adjusted to 2.5 with 6 N HCl. After extraction with EtOAc (3 x 100mL), the organic fractions were combined, washed with  $\text{H}_2\text{O}$  and dried ( $\text{MgSO}_4$ ). Concentration afforded the crude product, **2** as a yellow oil. Flash chromatography eluting with 5%  $\text{CH}_3\text{OH}$  in  $\text{CH}_2\text{Cl}_2$  gave 638 mg of the white solid (**2**) in 58% yield. mp 76–78 $^\circ\text{C}$ ;  $R_f$  0.30 (5%  $\text{CH}_3\text{OH}$  in  $\text{CH}_2\text{Cl}_2$ );  $[\alpha]_D^{24} = +7.9$  ( $c = 1.0$  in  $\text{CHCl}_3$ );  $^1\text{H}$  NMR (300 MHz,  $\text{CD}_3\text{OD}$ )  $\delta$  7.90–7.35 (m, 8H), 4.46 (d,  $J = 6.8$  Hz, 2H), 4.32 (t,  $J = 7.0$  Hz, 1H), 3.95 (dd,  $J = 4.9, 8.2$  Hz, 1H), 3.23 (t,  $J = 6.6$  Hz, 2H), 2.10–1.50 (m, 6H);  $^{13}\text{C}$  NMR (75.5 MHz,  $\text{CD}_3\text{OD}$ )  $\delta$  176.0, 159.4, 145.9, 143.1, 129.3, 128.7, 126.7, 121.5, 68.1, 64.7, 49.0, 42.0, 32.9, 30.9, 24.7;

LC/MS retention time 1.77 min,  $[M - H]^-$  393,  $[M + H]^+$  395.

**Peptide Synthesis.** The common peptide intermediate (**6**) was synthesized using Wang resin solid phase methodology.<sup>15</sup> Resin bound methodology was carried out on a 25  $\mu$ mol scale using 3 mL filtration tubes equipped with stopcocks in combination with a Burdick and Jackson multiport vacuum manifold system for resin washing. Each filtration tube was fitted with a cap for horizontal agitation on an orbital shaker during coupling reactions. Fmoc-Phenylalanine on Wang-resin was deprotected with 20% piperidine in DMF for 2 min and 8 min consecutively. The resin was washed with DMF (5 $\times$ ),  $\text{CH}_2\text{Cl}_2$  (5 $\times$ ), and  $\text{CH}_3\text{OH}$  (3 $\times$ ) and dried by aspiration. Synthesis of the amide bond to produce **6** was carried out by activating  $\alpha$ -azido- $\epsilon$ -N-Fmoc-L-lysine (**2**) (39.4 mg, 100  $\mu$ mol) with 100  $\mu$ mol each of HOBt (13.5 mg) and DCC (100  $\mu$ L of a 1M solution in  $\text{CH}_2\text{Cl}_2$ ) in 1.0 mL DMF. The condensation reactions was carried out for at least 1h while monitoring with the Kaiser test<sup>16</sup> and repeated if necessary after washing with the above protocol.

**Synthesis of azido peptides (7a–7c) utilizing the reduction-hydrolysis-coupling protocol.** The resin-bound azido dipeptide intermediate (**6**) (25  $\mu$ mol) was suspended in a mixture of dioxane (400  $\mu$ L) and  $\text{H}_2\text{O}$  (100  $\mu$ L) to promote hydrolysis of the iminophosphorane intermediate to the amine. Trimethylphosphine (1M in toluene) was added (150  $\mu$ L, 150  $\mu$ mol, 6.0 equiv.), capped, and shaken for 40 min. This was washed with anhydrous dioxane (5 $\times$ ) to remove excess trimethylphosphine. Azido-Val (14.3 mg, 100  $\mu$ mol) to be coupled was dissolved in 1.0 mL dioxane with *N*-hydroxysuccinimide (11.5 mg, 100  $\mu$ mol). While stirring on an ice bath DCC 1M (100  $\mu$ L, 100  $\mu$ mol) was added. After 5 min the reaction was removed from the ice bath stirred for an additional 45 min. This was added to the resin bound amine (reduced **6**), with the resulting mixture capped and agitated for at least 2h with some couplings allowed to proceed overnight. The resin bound azido tripeptide was then washed with DMF (5 $\times$ ),  $\text{CH}_2\text{Cl}_2$  (5 $\times$ ), and  $\text{CH}_3\text{OH}$  (3 $\times$ ) and dried by aspiration. All condensations were monitored with the Kaiser test<sup>16</sup> and

recoupled if needed. The reduction and coupling procedure was repeated to add  $\alpha$ -azido- $\gamma$ -9-fluorenylmethylester-L-glutamic acid (**1**) in the fourth position to form **7a**. An azido-Ile (for **7b**) or an azido-Ile followed by azido-Ala (for **7c**), were incorporated between the Val residue in position 3 and the  $\alpha$ -azido- $\gamma$ -9-fluorenylmethylester-L-glutamic acid (**1**).

**Synthesis of cyclized peptides (11a–11c).** The protected peptide intermediates (**7a–7c**), were deprotected on the side chains of the Lys and Glu residues by two 10 min treatments with 20% piperidine in DMF. The peptides (**8a–8c**) were washed with DMF (5 $\times$ ) and  $\text{CH}_2\text{Cl}_2$  (5 $\times$ ). Cyclization to **9a–9c** was performed under acid activating conditions<sup>10g</sup> with HOBt (8.5 mg, 2.5 equiv.) and DCC (62.5  $\mu$ L of a 1M solution in  $\text{CH}_2\text{Cl}_2$ , 2.5 equiv.) in 1.3 mL DMF for 24 h. The amine was monitored with the Kaiser test after washing with DMF (5 $\times$ ) and  $\text{CH}_2\text{Cl}_2$  (5 $\times$ ). Re-treatment with HOBt and DCC was routinely performed until the resin was ninhydrin negative, indicating the formation of **9a–9c** was complete.

After washing with DMF (5 $\times$ ),  $\text{CH}_2\text{Cl}_2$  (5 $\times$ ), and  $\text{CH}_3\text{OH}$  (3 $\times$ ) the resins were dried under vacuum. The N-terminal azides (**9a–9c**), were suspended in a mixture of dioxane (400  $\mu$ L) and  $\text{H}_2\text{O}$  (100  $\mu$ L). Trimethylphosphine (1M in toluene) was added (150  $\mu$ L, 150  $\mu$ mol, 6.0 equiv.), capped, and shaken for 40 min, followed by washing with anhydrous dioxane (5 $\times$ ). The resins were then treated with Fmoc-Val-OSu (43.7 mg, 100  $\mu$ M, 4 equiv.) in 1.5 mL dioxane for 1 h. The resin bound targets (**10a–10c**) were washed with DMF (5 $\times$ ),  $\text{CH}_2\text{Cl}_2$  (5 $\times$ ), and  $\text{CH}_3\text{OH}$  (3 $\times$ ) and dried under vacuum. Treatment with 2 mL TFA: $\text{CH}_2\text{Cl}_2$  (50:50) for 1 h and collection of the cleavage solution followed by washing with the same solution (1 $\times$ ) provided crude **11a–11c** which were concentrated under reduced pressure and analyzed. Analytical data for **11a**. LC/MS retention time 1.60 min,  $[M - H]^-$  824, purity > 90%; **11b**. LC/MS retention time 1.80 min,  $[M - H]^-$  937,  $[M + H]^+$  939, purity > 90%; HRMS *m/e* calcd for  $\text{C}_{51}\text{H}_{67}\text{N}_7\text{O}_{10}$  ( $M + H$ )<sup>+</sup> 938.4952, found 938.50156; **11c**. LC/MS retention time 1.86 min,  $[M - H]^-$  1008,  $[M + H]^+$  1010, purity > 90%; HRMS *m/e* calcd for  $\text{C}_{54}\text{H}_{72}\text{N}_8\text{O}_{11}$  ( $M + H$ )<sup>+</sup> 1009.53233, found 1009.53836.
